# Supplementary material
Source: publisher site journal article supplement (http://www.spandidos-publications.com/6213/downloadSupplementary)
Supplement: Supplementary file 1 [file downloadSupplementary]

## Sheet: Sheet1
Table SIV. Overlap of genes between differentially expressed genes, turquoise module genes and ferroptosis-related genes (differentially expressed ferroptosis-related genes).
Differentially expressed ferroptosis-related genes	logFC	adjusted.P-value
CYBB	-0.75946	0.017279
TFRC	-1.32555	0.001706
SLC1A5	-0.88864	0.001656
SAT1	-0.75213	0.018045
IL6	-1.13495	0.004568
ACADSB	0.84722	0.007537
SNCA	0.943302	0.00565
GJA1	0.741355	0.020694
MIR15A	1.12597	0.012263
TIMP1	-1.16024	0.032386
SLC40A1	1.20178	0.002463
SCD	-1.35011	0.002682
CDKN1A	-1.34115	0.002514
ISCU	1.11393	0.001034
CD44	-1.25067	0.010809
NF2	-0.88503	0.004393
ZFP36	-1.04702	0.016318
ECH1	0.669767	0.029794
MGST1	-1.09885	0.011492
